# Supplementary material for: Absence of RNA‐binding protein FXR2P prevents prolonged phase of kainate‐induced seizures
Source: PubMed Central journal article supplement — EMBO Rep. 2021 Mar 28;22(4):e51404. doi: 10.15252/embr.202051404 (PMC8024897; doi:10.15252/embr.202051404), 2021-03-28
Supplement: EMBR-22-e51404-s006.pdf [file EMBR-22-e51404-s006.pdf]

## Expanded View Figures

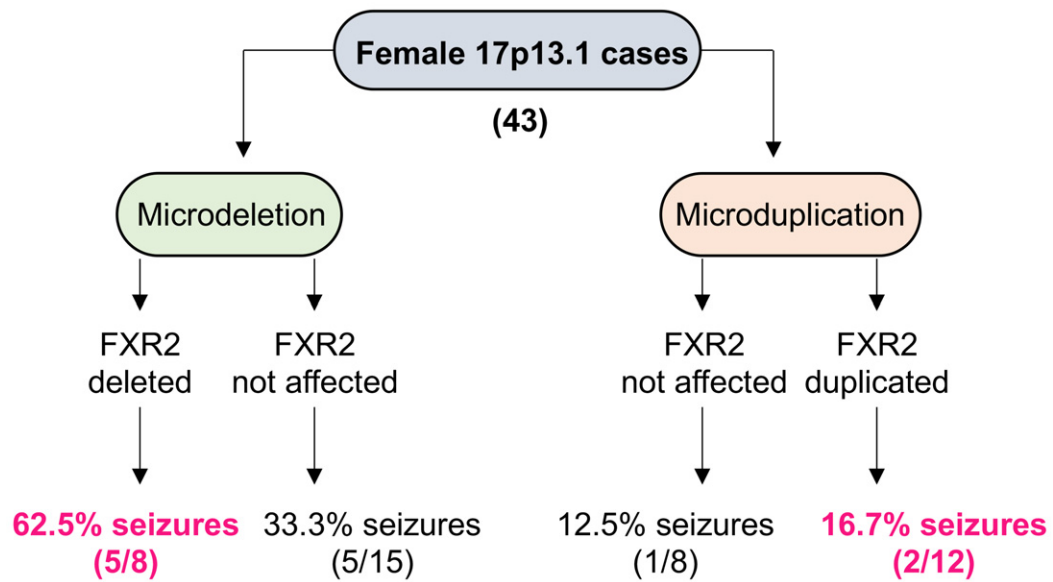

**Figure EV1. Frequency of seizures in females with 17p13.1 deletion/duplication.**

The analysis consists of 43 females described in the DECIPHER database and the CNV database from center of Medical Genetics in Antwerp (Belgium). 23 Patients carried a microdeletion of the 17p13.1 locus whereas 20 patients carried a microduplication.

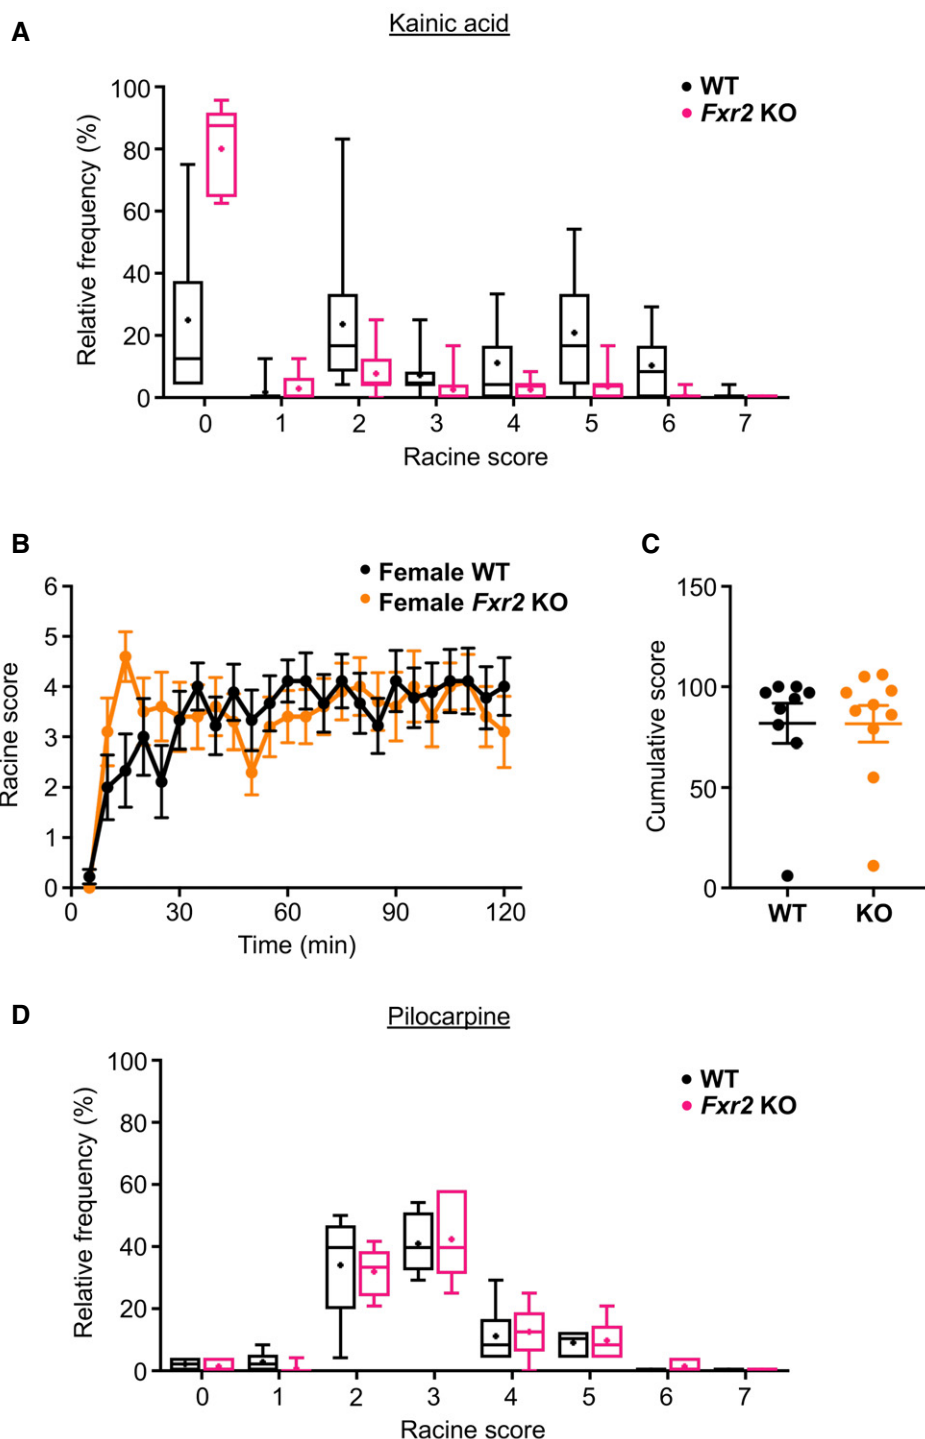

**Figure EV2. Seizure distribution based on convulsant and gender.**

- A Relative frequency of the different Racine scores in WT (black,  $n = 16$ ) and *Fxr2* KO (magenta,  $n = 12$ ) upon KA administration (Chi-square test;  $\chi^2_7 = 175.67$ ,  $P < 0.001$ ). Data are presented boxplots defined by median, quantiles 0.25 and 0.75. The length of the whiskers indicates 1.5 times the interquartile range (IQR).
- B Average seizure score of female KA-treated WT ( $n = 9$ ) and *Fxr2* KO mice ( $n = 10$ ) over time from  $t = 0$  (injection time) to 2 h. No genotype-dependent differences observed (two-way repeated measures ANOVA). Data are presented as mean  $\pm$  SEM.
- C Responsiveness to KA of female WT (black,  $n = 9$ ) and female *Fxr2* KO mice (orange,  $n = 10$ ). KA-treated WT mice ( $n = 9$ ), KA-treated *Fxr2* KO mice ( $n = 10$ ; two-tailed Student's  $t$ -test). Data are presented as mean  $\pm$  SEM.
- D Relative frequency of the different Racine scores in WT ( $n = 6$ ) and *Fxr2* KO mice ( $n = 6$ ) upon pilocarpine administration (Chi-square test). Data are presented boxplots defined by median, quantiles 0.25 and 0.75. The length of the whiskers indicates 1.5 times the interquartile range (IQR).

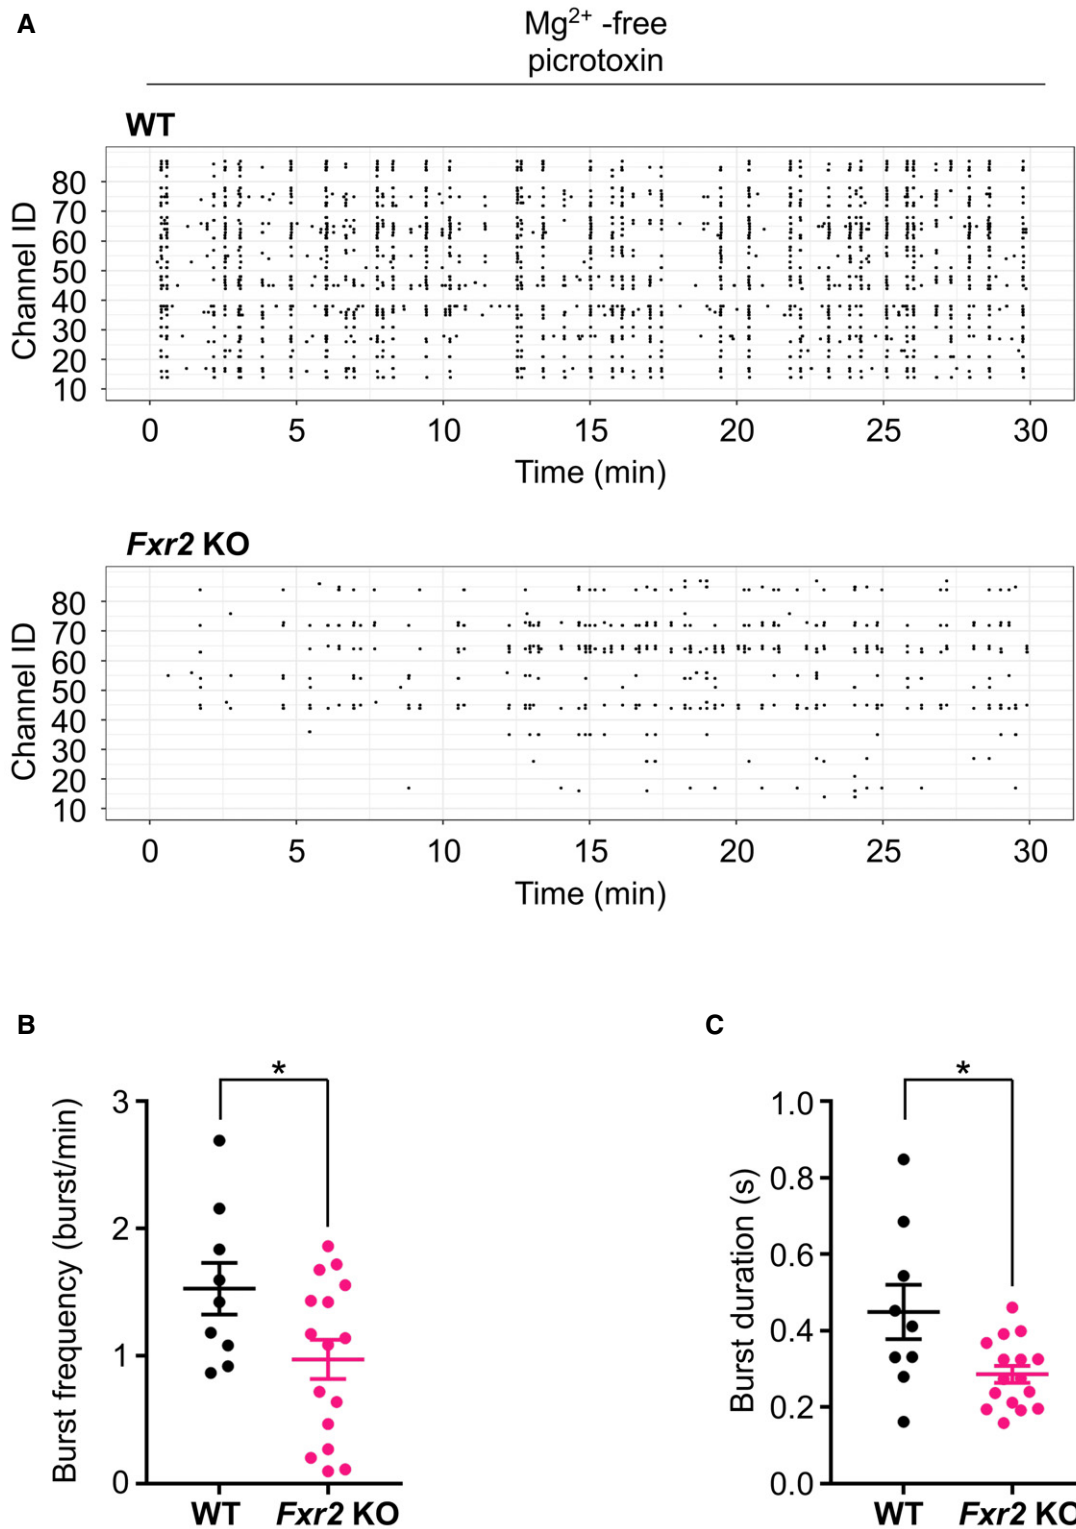

**Figure EV3. Multi-electrode array recording in WT and *Fxr2* KO hippocampi.**

A Representative rasterplot showing burst activity from a WT (top) and *Fxr2* KO (bottom) hippocampal slice recorded in a multi-electrode array (MEA) preparation.  
 B, C Burst frequency and burst duration. \* $P < 0.05$ , significant difference compared with WT slices. ( $n = 9$  slices taken from 6 WT mice, 16 slices taken from 8 *Fxr2* KO mice; two-tailed Student's  $t$ -test: burst frequency:  $t_{23} = 2.17$ ,  $P < 0.05$ ; burst duration:  $t_{23} = 2.71$ ,  $P < 0.05$ ). Data are presented as mean  $\pm$  SEM.

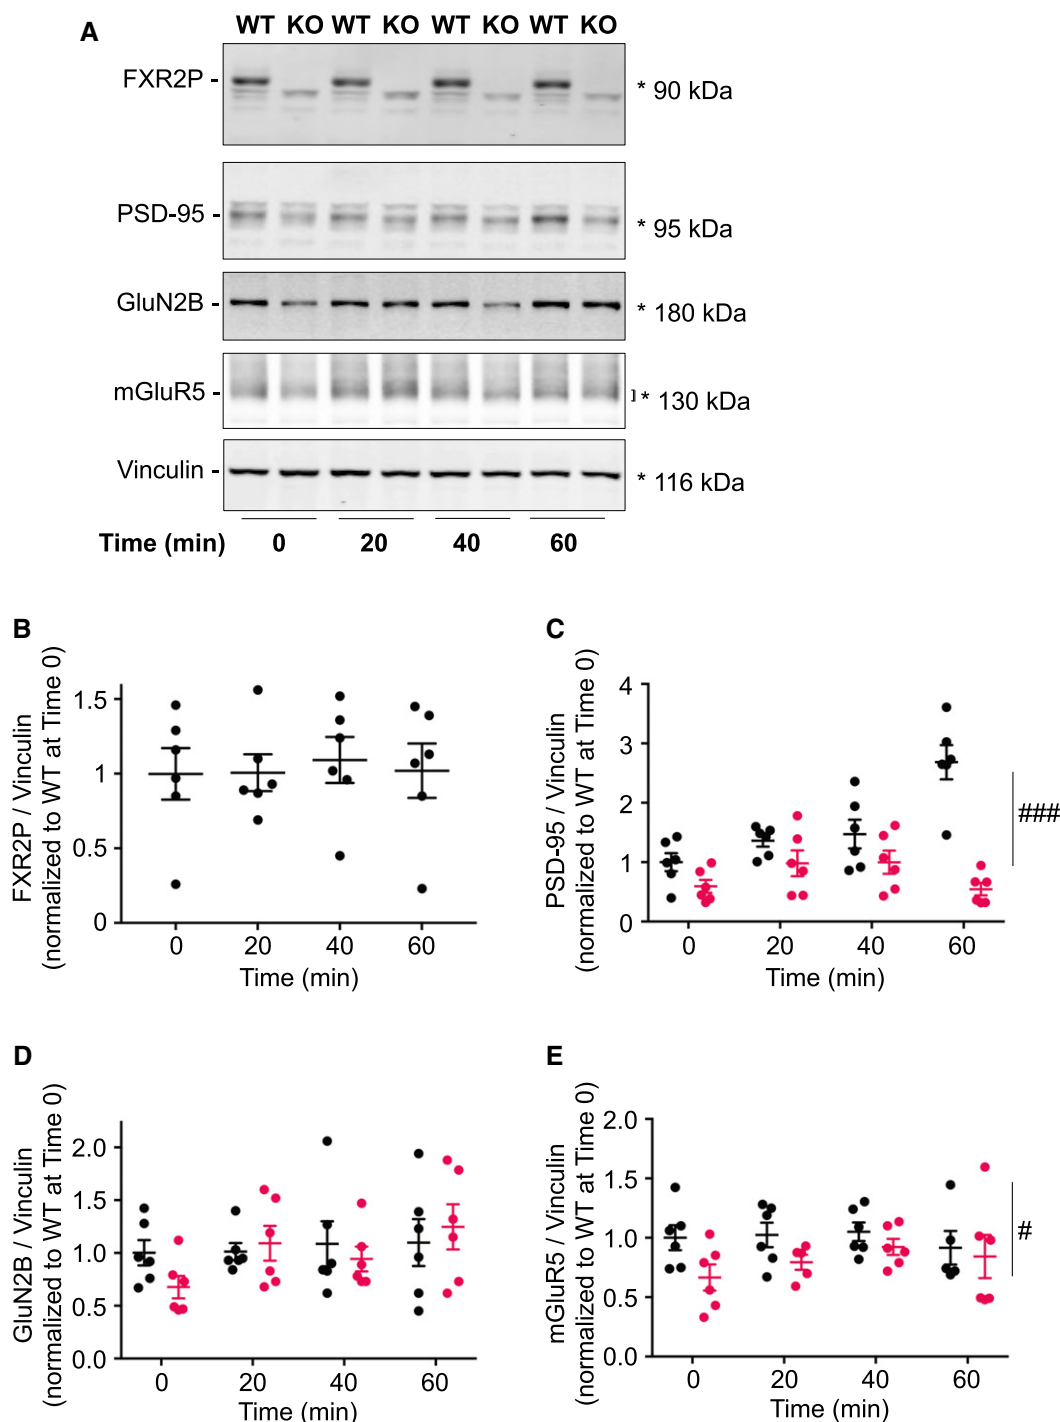

**Figure EV4. FXR2P and glutamatergic protein expression in KA-treated WT and *Fxr2* KO mice at different time intervals.**

A Representative Western blot to detect the expression of FXR2P, PSD-95, GluN2B, and mGluR5 proteins over different time intervals (0, 20, 40, and 60 min) in WT and *Fxr2* KO hippocampi. Quantified bands are highlighted with an asterisk or squared bracket.

B Bar plot showing FXR2P expression over Vinculin in KA-treated WT sacrificed at different time intervals (one-way ANOVA). Data are presented as mean  $\pm$  SEM.

C Bar plot showing PSD-95 expression in control and KA-treated WT and *Fxr2* KO mice. ### $P < 0.001$ , overall significant difference between WT and *Fxr2* KO samples (two-way ANOVA: Genotype effect,  $F_{1,40} = 40.90$ ,  $P < 0.001$ ; Interaction of genotype and time,  $F_{3,40} = 10.49$ ,  $P < 0.001$ ). Data are presented as mean  $\pm$  SEM.

D Barplot showing GluN2B expression in control and KA-treated WT and *Fxr2* KO mice (two-way ANOVA). Data are presented as mean  $\pm$  SEM.

E Barplot showing mGluR5 expression in control and KA-treated WT and *Fxr2* KO mice. # $P < 0.05$ , overall significant difference between WT and *Fxr2* KO samples (two-way ANOVA: Genotype effect,  $F_{1,38} = 5.90$ ,  $P = 0.02$ ). Data are presented as mean  $\pm$  SEM. Group sizes were  $n = 6$  for each genotype and interval throughout the figure.
